# Supplementary material for: The Arabidopsis Cdk1/Cdk2 homolog CDKA;1 controls chromosome axis assembly during plant meiosis
Source: PubMed Central journal article supplement (PMC6996576; doi:10.15252/embj.2019101625), 2019-09-26
Supplement: EMBJ-39-e101625-s001.pdf [file EMBJ-39-e101625-s001.pdf]

## Yang et al., Appendix

Table of contents:

Appendix Figures S1-S3

Appendix Table S1

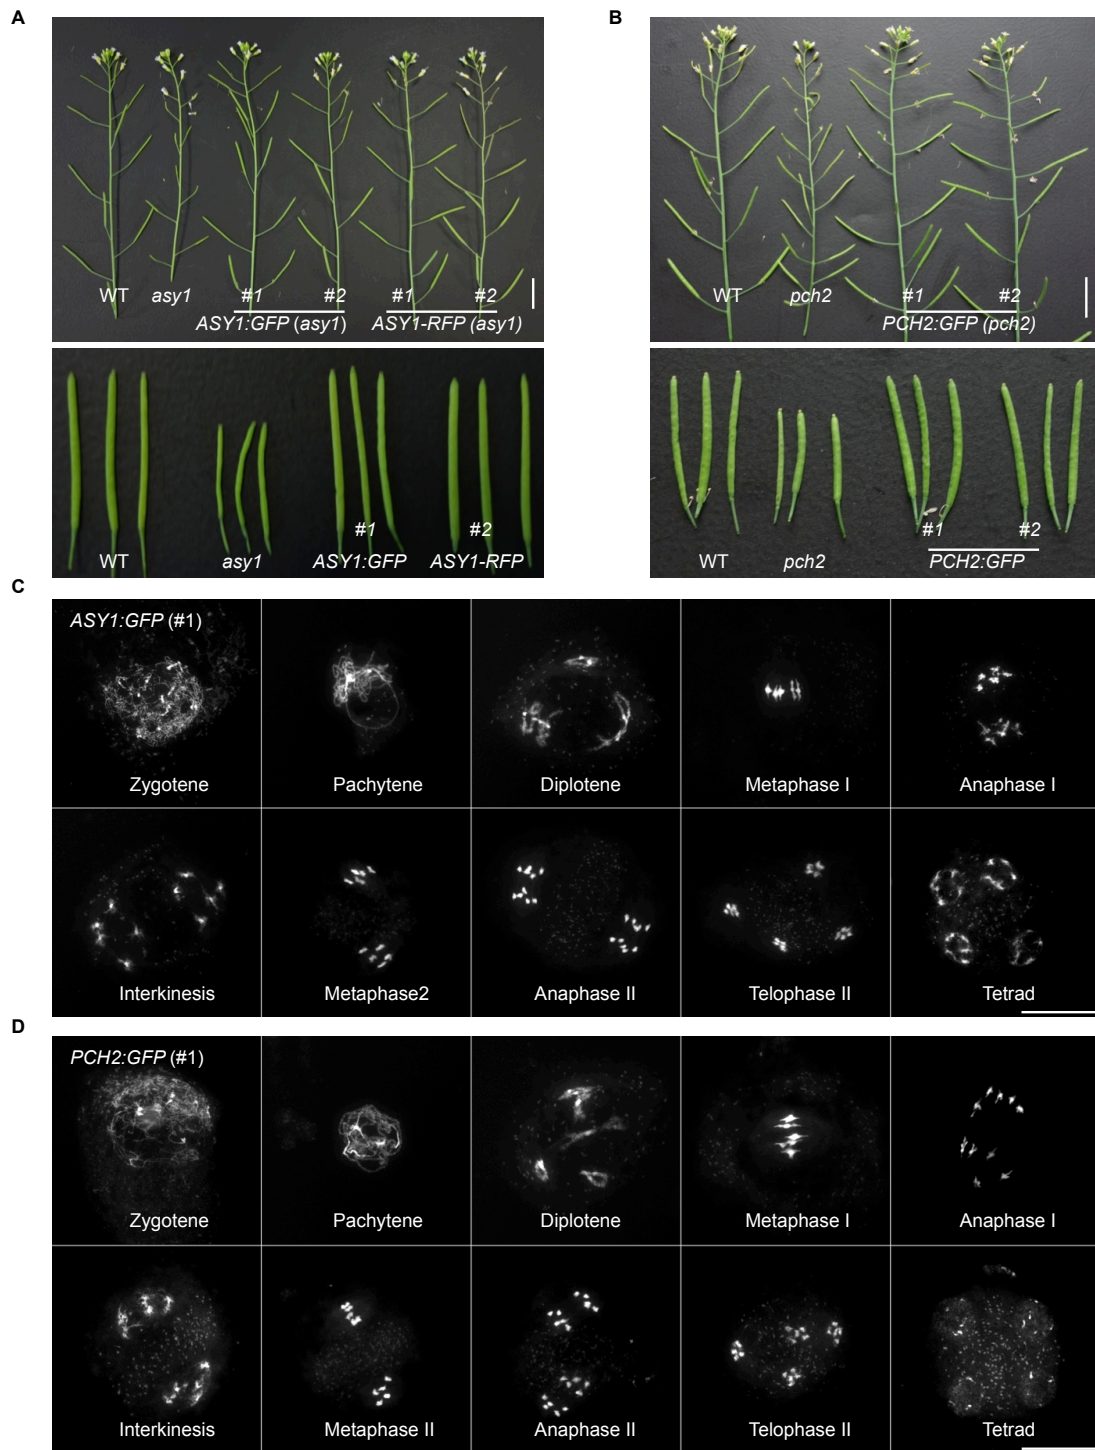

**Appendix Figure S1. The ASY1 and PCH2 reporters are fully functional.**

(A) The main stems (upper panel) and siliques (lower panel) of the wildtype (WT), *asy1* and two *ASY1:GFP/RFP* lines are shown.

(B) The main stems (upper panel) and siliques (lower panel) of the wildtype (WT), *pch2* and two *PCH2:GFP* lines.

(C) Chromosome spread analysis of male meiocytes in *ASY1:GFP* line #1 shows a wild-type like meiotic program. Bars: 20 $\mu$ m.

(D) Chromosome spread analysis of male meiocytes in *PCH2:GFP* #1 shows a wild-type like meiotic program. Bars: 20 $\mu$ m.

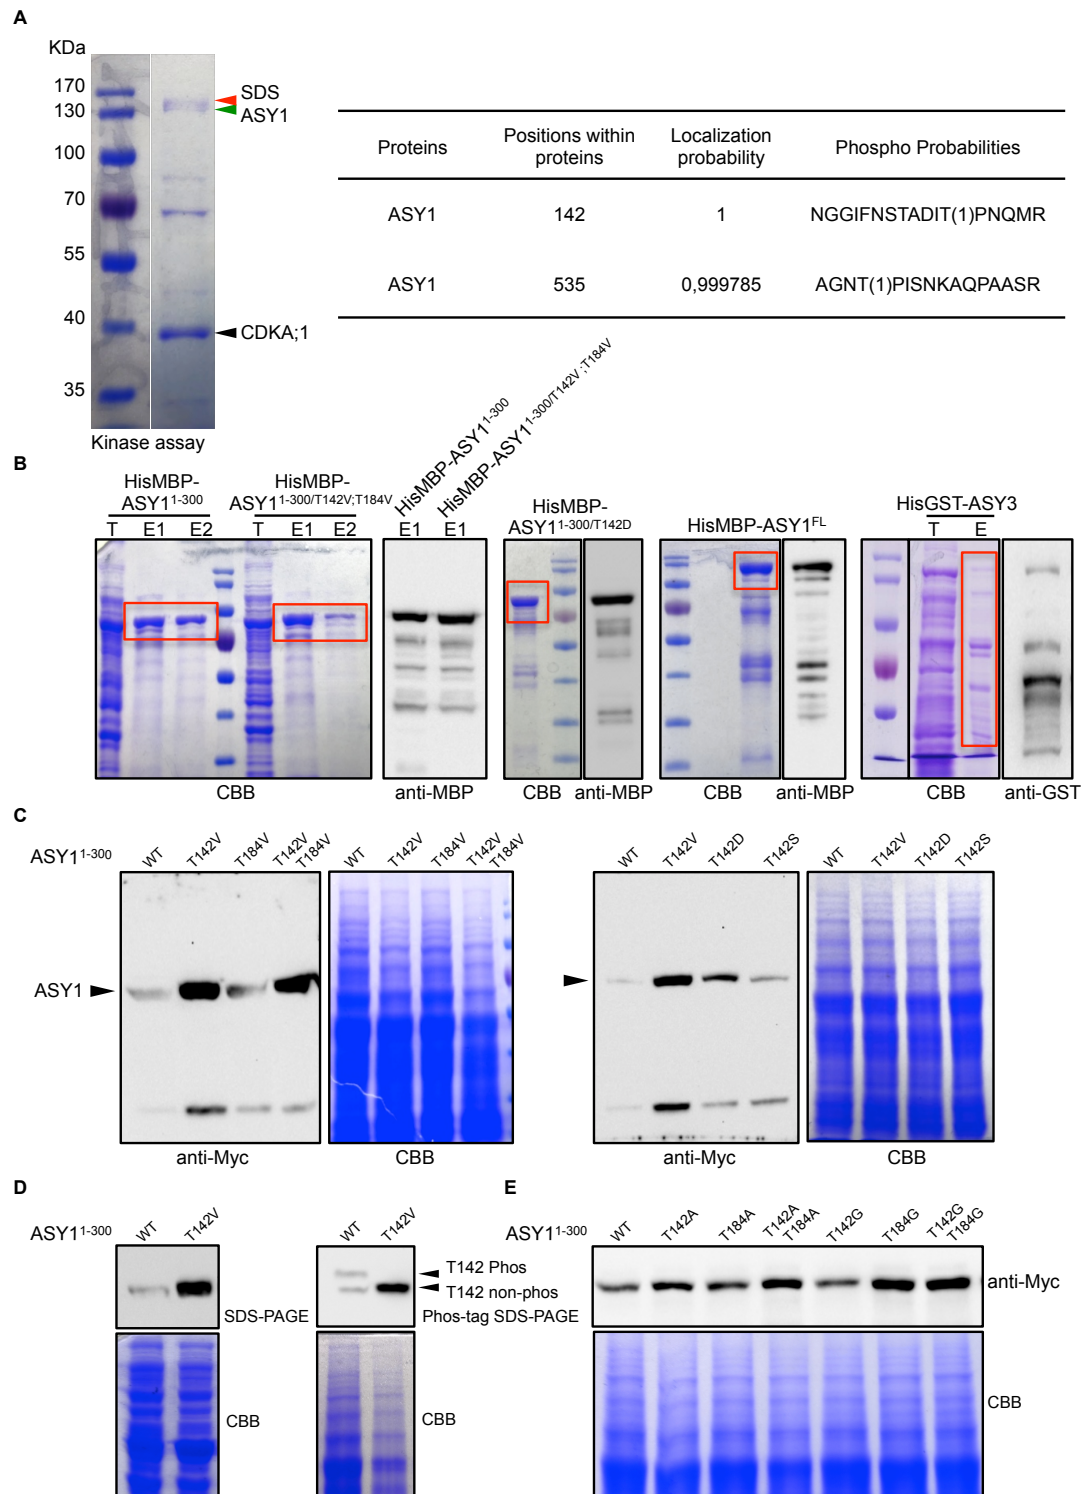

**Appendix Figure S2. Mass spectrometry analysis and coomassie brilliant blue (CBB) stained gels of all purified proteins from *Escherichia coli* used in this research.**

(A) CBB staining of the proteins after kinase reaction of ASY1 with CDKA;1-SDS complexes. The red, green and black arrowheads denote the SDS, ASY1, or CDKA;1

proteins, respectively. The table depicts identified ASY1 phosphorylation sites by mass spectrometry, their positions, their localization probabilities and the actual peptides.

(B) CBB staining and western blot of purified HisMBP-ASY1<sup>1-300</sup>, HisMBP-ASY1<sup>1-300/T142V;T184V</sup>, HisMBP-ASY1<sup>1-300/T142D</sup>, HisMBP-ASY1 and His-GST-ASY3 proteins.

(C) Protein abundance analysis of ASY1 variants expressed in yeast. Total protein extracts of yeast cells expressing binding domain-Myc-tagged ASY1<sup>1-300</sup>, ASY1<sup>1-300/T142V</sup>, ASY1<sup>1-300/T184V</sup>, ASY1<sup>1-300/T142V;T184V</sup>, ASY1<sup>1-300/T142D</sup>, and ASY1<sup>1-300/T142S</sup> were subjected to western blot analysis using an anti-Myc antibody. The protein loading were shown by CBB staining.

(D) The left panel shows the SDS-PAGE analysis of the extracts of yeast cells expressing ASY1<sup>1-300</sup> and ASY1<sup>1-300/T142V</sup> and the right panel denotes the phos-tag gel analysis using an anti-Myc antibody. The CBB staining shows the protein loading.

(E) Protein abundance analysis of ASY1 variants expressed in yeast. Total protein extracts of yeast cells expressing binding domain-Myc-tagged ASY1<sup>1-300</sup>, ASY1<sup>1-300/T142A</sup>, ASY1<sup>1-300/T184A</sup>, ASY1<sup>1-300/T142A;T184A</sup>, ASY1<sup>1-300/T142G</sup>, ASY1<sup>1-300/T184G</sup>, and ASY1<sup>1-300/T142G;T184G</sup> were subjected to western blot analysis using an anti-Myc antibody. The protein loading were shown by CBB staining.

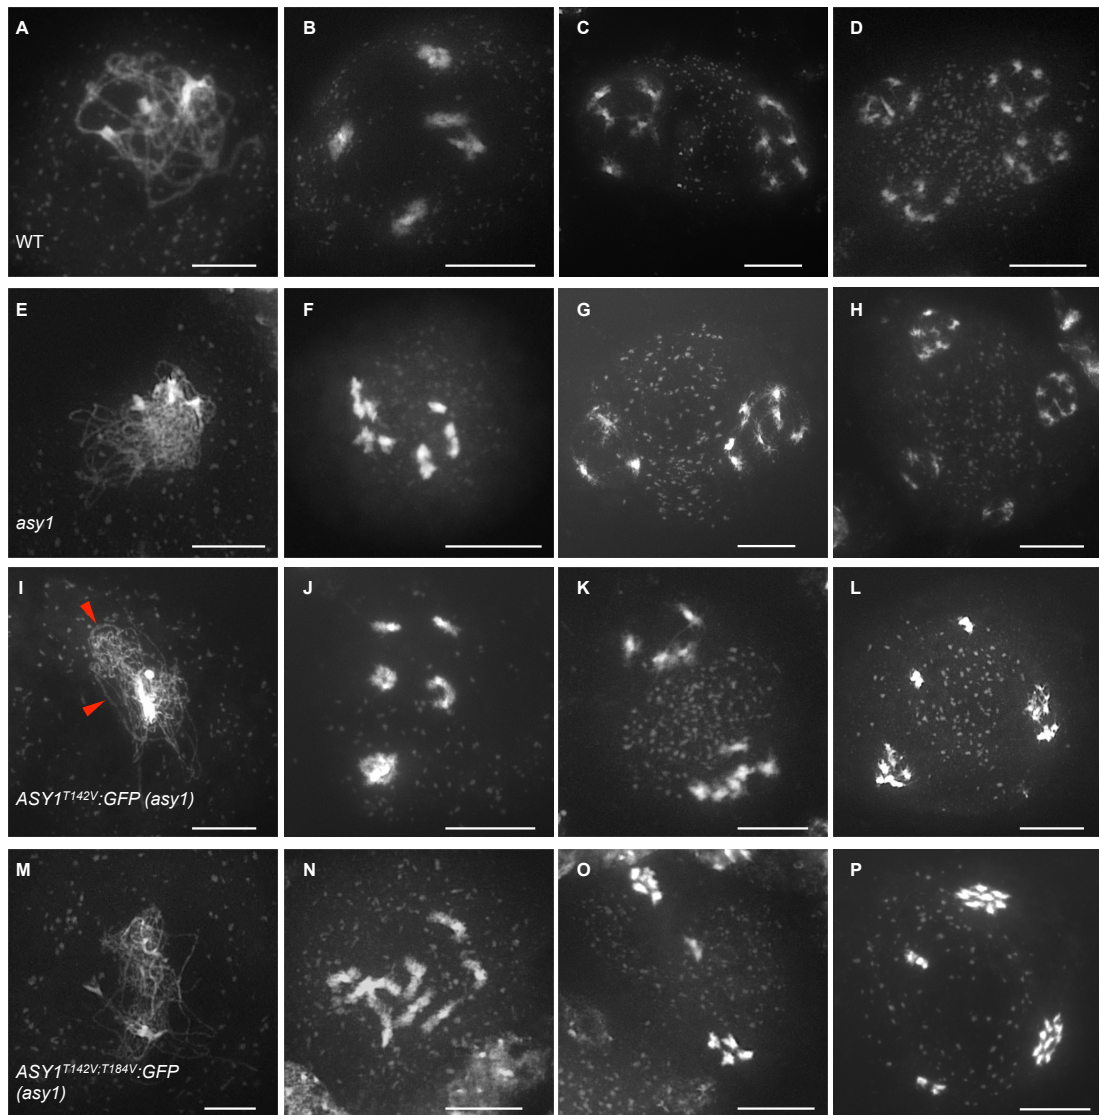

**Appendix Figure S3. Chromosome spread analysis of male meiocytes in the wildtype (WT) (A-D), *asy1* mutant (E-H),  $ASY1^{T142V}:GFP$  (*asy1*) (I-L), and  $ASY1^{T142V;T184V}:GFP$  (*asy1*) (M-P) plants.**

(A, E, I, M) pachytene or pachytene-like stages; (B, F, J, N) diakinesis or diakinesis-like stages; (C, G, K, O) interkinesis or interkinesis-like stages; (D, H, L, P) tetrad or tetrad-like stages. Red arrowheads indicate the partially synaptic chromosomes. Bars: 5 $\mu$ m.

## Appendix table S1. Primer used in the research

| Purpose                                          | Primer name                  | Sequence                                                                       |
|--------------------------------------------------|------------------------------|--------------------------------------------------------------------------------|
| CDKA;1:mVenus reporter                           | gCDKA;1-F                    | ACCAAGACACCAAGCGCAA                                                            |
|                                                  | gCDKA;1-R                    | CAGAATGGAAGCGTCTTTGCTT                                                         |
|                                                  | pENTR2B-CDKA;1-F             | AAGCAAAGACGCTTCCATTCTGCGCGGCCGCACTCGAGATA                                      |
|                                                  | pENTR2B-CDKA;1-F             | TTGCGCTTGGTGTCTTGGTGGATCCAGTCGACTGAATTG                                        |
|                                                  | gCDKA;1-SmalSTOP-F           | GGGATCTTTCCGTATTTTGGTCATT                                                      |
|                                                  | gCDKA;1-SmalSTOP-R           | GGGAGGCATGCCTCCAAGATCCTTG                                                      |
| ASY1:GFP and ASY1:RFP reporters                  | gASY1-F                      | CAGGGTGGGGTCCAGTTAAG                                                           |
|                                                  | gASY1-R                      | TGTCCACGTAATCCAACGGT                                                           |
|                                                  | gASY1-smalSTOP- F            | GGGTGAAGACACCACCTCTA                                                           |
|                                                  | gASY1-smalSTOP- R            | GGGATTAGCTTGAGATTTCTG                                                          |
|                                                  | pENTR2B-ASY1-F               | TATCAACCGTTGGATTACGTGGACAG<br>CGGCCGCACTCGAGATATC<br>CTCTTCTTAAGTGGACCCACCCTGG |
|                                                  | pENTR2B-ASY1-R               | GATCCAGTCGACTGAATTG                                                            |
| ASY1:GFP dephospho- and phospho-mimicry variants | gASY1-T142V-F                | GTCCCAAATCAAATGAGGTGC                                                          |
|                                                  | gASY1-T142V-R                | AATGTCAGCAGTGGAGTTA                                                            |
|                                                  | gASY1-T184V-F                | GTGGTATGATTACAGCCTTCC                                                          |
|                                                  | gASY1-T184V-R                | CACATCATCGTAGTACAGAA                                                           |
|                                                  | gASY1-T365V-F                | GTACCAGAGAGCGAATTCACC                                                          |
|                                                  | gASY1-T365V-R                | CTGAAATTTTGGGGTAAGTA                                                           |
|                                                  | gASY1S382V -F                | GTTCCAGGGAAATCTGTTGCT                                                          |
|                                                  | gASY1-S382V-R                | AATTTGACCATCGGCTTCCT                                                           |
|                                                  | gASY1-T535V-F                | GTTCCATTAGCAACAAGGCA                                                           |
|                                                  | gASY1-T535V-R                | GTTCCAGCTTTAGAGATAG                                                            |
|                                                  | gASY1-T142S-F                | TCACCAAATCAAATGAGgtgcagtgtg                                                    |
| gASY1-T142D-F                                    | GATCCCAAATCAAATGAGgtgcagtgtg |                                                                                |
| ASY1 <sup>1-570</sup> :GFP                       | gASY1-570aa-R                | CTGTGAGGCTTGGCTACAGTTGACTGTC                                                   |
|                                                  | mGFP-F                       | CCCGGGGGTGGCatggtgagcaagggcgaggagc                                             |
| Y2H and/or protein expression                    | ASY1-attB1-F                 | GGGGACAAGTTTGTACAAAAAAGCAGGCTTCATGGTGATGGCTC<br>AGAAGCT                        |
|                                                  | ASY1-attB1-R                 | GGGGACCACTTTGTACAAGAAAGCTGGGTTTCAATTAGCTTGAG<br>ATTTCTG                        |
|                                                  | ASY1 1-300 attB2-R           | GGGGACCACTTTGTACAAGAAAGCTGGGTTTCACTCAGCCGGAT<br>CCTGTGTGT                      |
|                                                  | ASY1 T142V CDS-F             | GTCCCAAATCAAATGAGGAGTTCAG                                                      |
|                                                  | ASY1 T142V CDS-R             | AATGTCAGCAGTGGAGTTAAATATT                                                      |
|                                                  | ASY1 T184V CDS-F             | GTGCCACCAGATTACGAGCCACCTT                                                      |
|                                                  | ASY1 T184V CDS-R             | CACATCATCGTAGTACAGAAGCTTC                                                      |
|                                                  | ASY1-571aa-F                 | GACAGACGTGGCAGGAAAACCAGCATGG                                                   |
|                                                  | attL1-R2                     | GAAGCCTGCTTTTTTGTACAAAGTTGG                                                    |
|                                                  | ASY1-570attB2-R              | GGGGACCACTTTGTACAAGAAAGCTGGGTTTCACTGTGAGGCTT<br>GGCTACAGTTG                    |
|                                                  | ASY1 T142S CDS-F             | TCACCAAATCAAATGAGGAGTTCAG                                                      |
| ASY1 T142D CDS-F                                 | GACCCCAAATCAAATGAGGAGTTCAG   |                                                                                |
| PCH2:GFP reporter                                | gPch2-F                      | TACATGGAAGCTAAAGTCGTCGTCAG                                                     |
|                                                  | gPch2-R                      | GGGGACAAGTTTGTACAAAAAAGCAGGCTTCACACGGATACTGC<br>CTTCAAGACAA                    |
|                                                  | gPch2-attB1-F                | GGGGACCACTTTGTACAAGAAAGCTGGGTTgatcagatgacttggtgctg<br>ac                       |
|                                                  | gPch2-interAscl-F            | AAGCATGGCGCGCCGCGACTATTCCAGTGCAAATAGCCG                                        |
|                                                  | gPch2-interAscl-R            | AAGCATGGCGCGCCTGCTTCAATGGGGTTTTGGTAAGAG                                        |

---

|                                |                 |                                |
|--------------------------------|-----------------|--------------------------------|
| Genotyping of<br><i>cdka;1</i> | CDKA;1-WT-F     | AAAAAACTATAACATAATTGGCAAC      |
|                                | CDKA;1-WT/mut-R | TGTACAAGCGAATAAAGACATTTGA      |
|                                | CDKA;1-mut-F    | GCGTGGACCGCTTGCTGCAACTCTCTCAGG |

---

|                              |                      |                           |
|------------------------------|----------------------|---------------------------|
| Genotyping of<br><i>asy1</i> | N546272L             | AGGTGGCTCGTAATCTGGTGGCTGC |
|                              | N546272U             | TCTATGTTTGTTACGCGTTAATCAG |
|                              | SALK LBb1.3          | ATTTTGCCGATTTTCGGAAC      |
|                              | GenotypeT1 WT allele | CTGGGTTGGGCTGTAACATT      |

---
