# Supplementary material for: The Arabidopsis Cdk1/Cdk2 homolog CDKA;1 controls chromosome axis assembly during plant meiosis
Source: PubMed Central journal article supplement (PMC6996576; doi:10.15252/embj.2019101625), 2019-09-26
Supplement: EMBJ-39-e101625-s002.pdf [file EMBJ-39-e101625-s002.pdf]

## Expanded View Figures

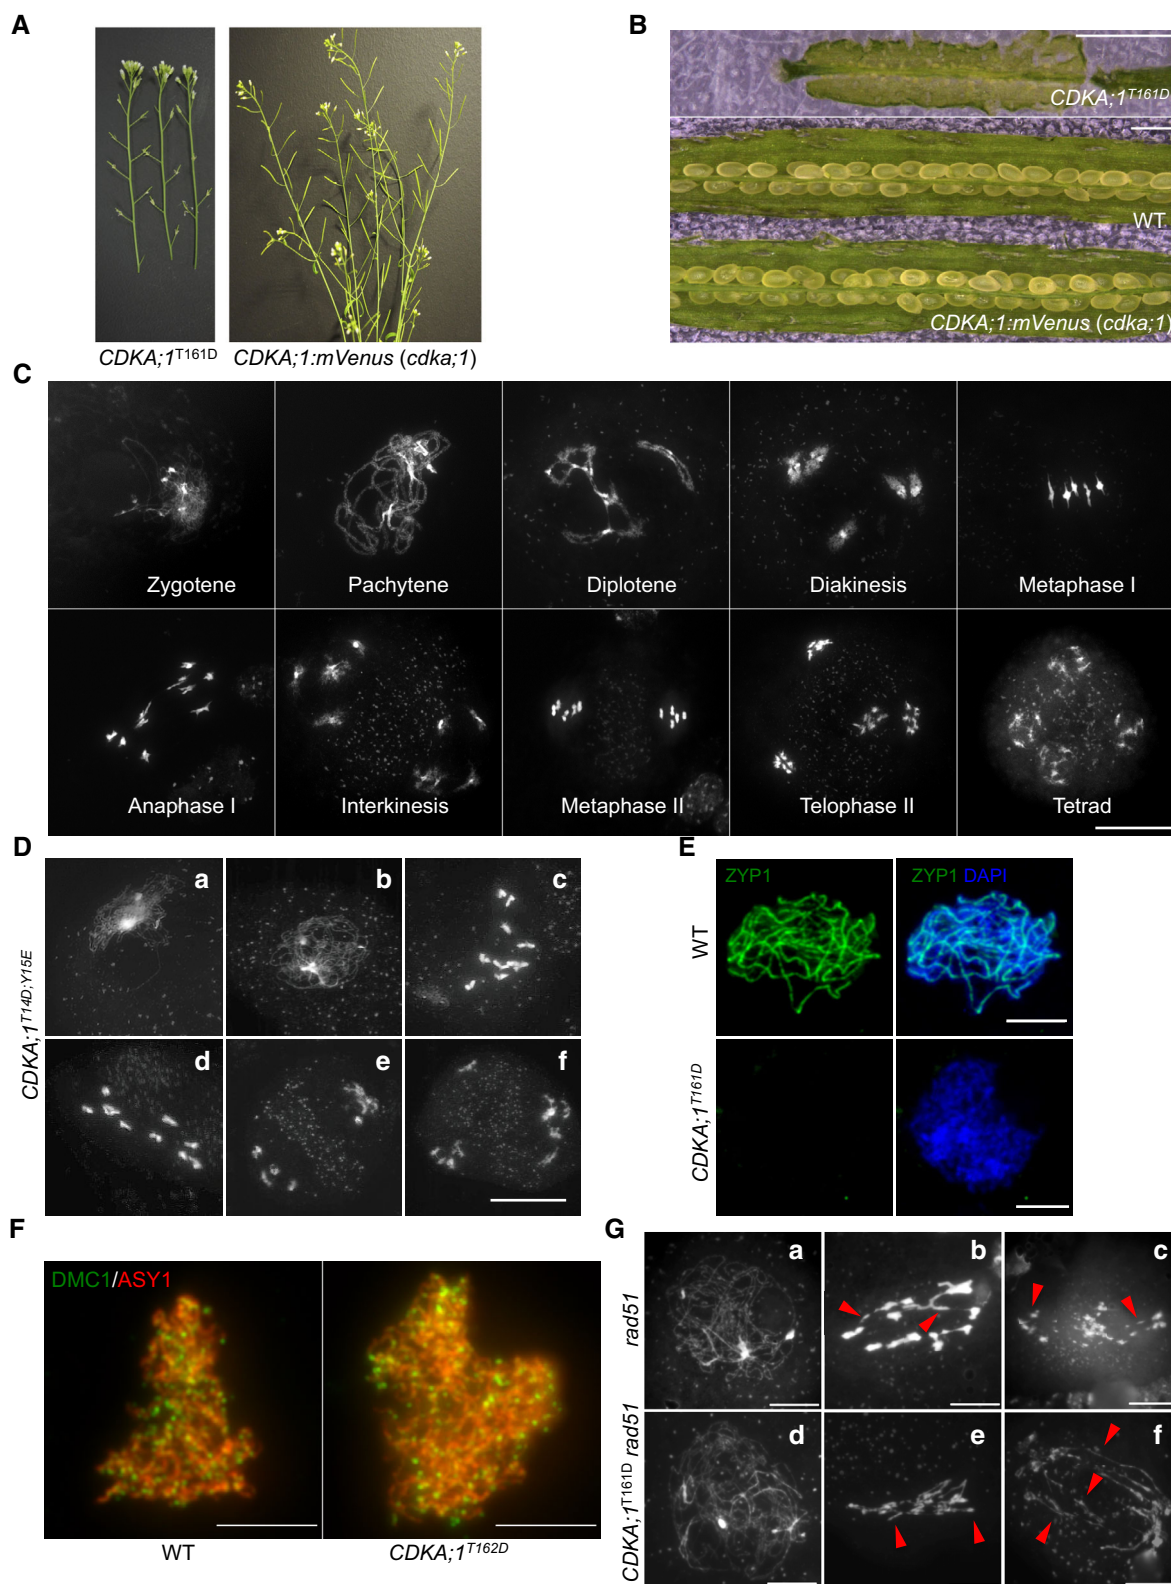

Figure EV1.

**Figure EV1. CDKA;1-mVenus fully complements the *cdka;1* mutant phenotype.**

- A The stems of a hypomorphic *cdka;1* mutant *CDKA;1<sup>T161D</sup>* are completely sterile as indicated by short siliques in contrast to homozygous *cdka;1* mutant expressing the *CDKA;1:mVenus* reporter construct that form long siliques and are full fertile.
- B The siliques of hypomorphic *CDKA;1<sup>T161D</sup>* do not harbor viable seeds in contrast to homozygous *cdka;1* mutant expressing *CDKA;1:mVenus* that develop healthy and plump seeds. Scale bars: 1 mm.
- C Chromosome spread analysis of male meiocytes of a homozygous *cdka;1* mutant expressing a functional *CDKA;1:mVenus* reporter reveals a wild type-like meiotic program. Scale bar: 20  $\mu$ m.
- D Chromosome spread analysis of the hypomorphic *cdka;1* mutant *CDKA;1<sup>T14D,Y15E</sup>*. (a) zygotene-like stage; (b) pachytene-like stage; (c, d) diakinesis-like stages; and (e, f) end of meiosis I with two or three pools of chromosomes. Scale bar: 20  $\mu$ m.
- E Immunolocalization of ZYP1 (green) in wild-type (WT) and *CDKA;1<sup>T161D</sup>* mutants. Chromosomes are stained with DAPI (blue). Scale bars: 5  $\mu$ m.
- F Immunolocalization analysis of DMC1 (green) together with ASY1 (red) in late leptotene of male meiocytes of wild-type (WT) and *CDKA;1<sup>T161D</sup>* mutants. Scale bars: 5  $\mu$ m.
- G Chromosome spread analysis of *rad51* and *rad51 CDKA;1<sup>T161D</sup>* mutants. (a, d) pachytene-like stage; (b, c, e, and f) anaphase I-like stage. Red arrowheads indicate the chromosomal fragments. Scale bars: 10  $\mu$ m.

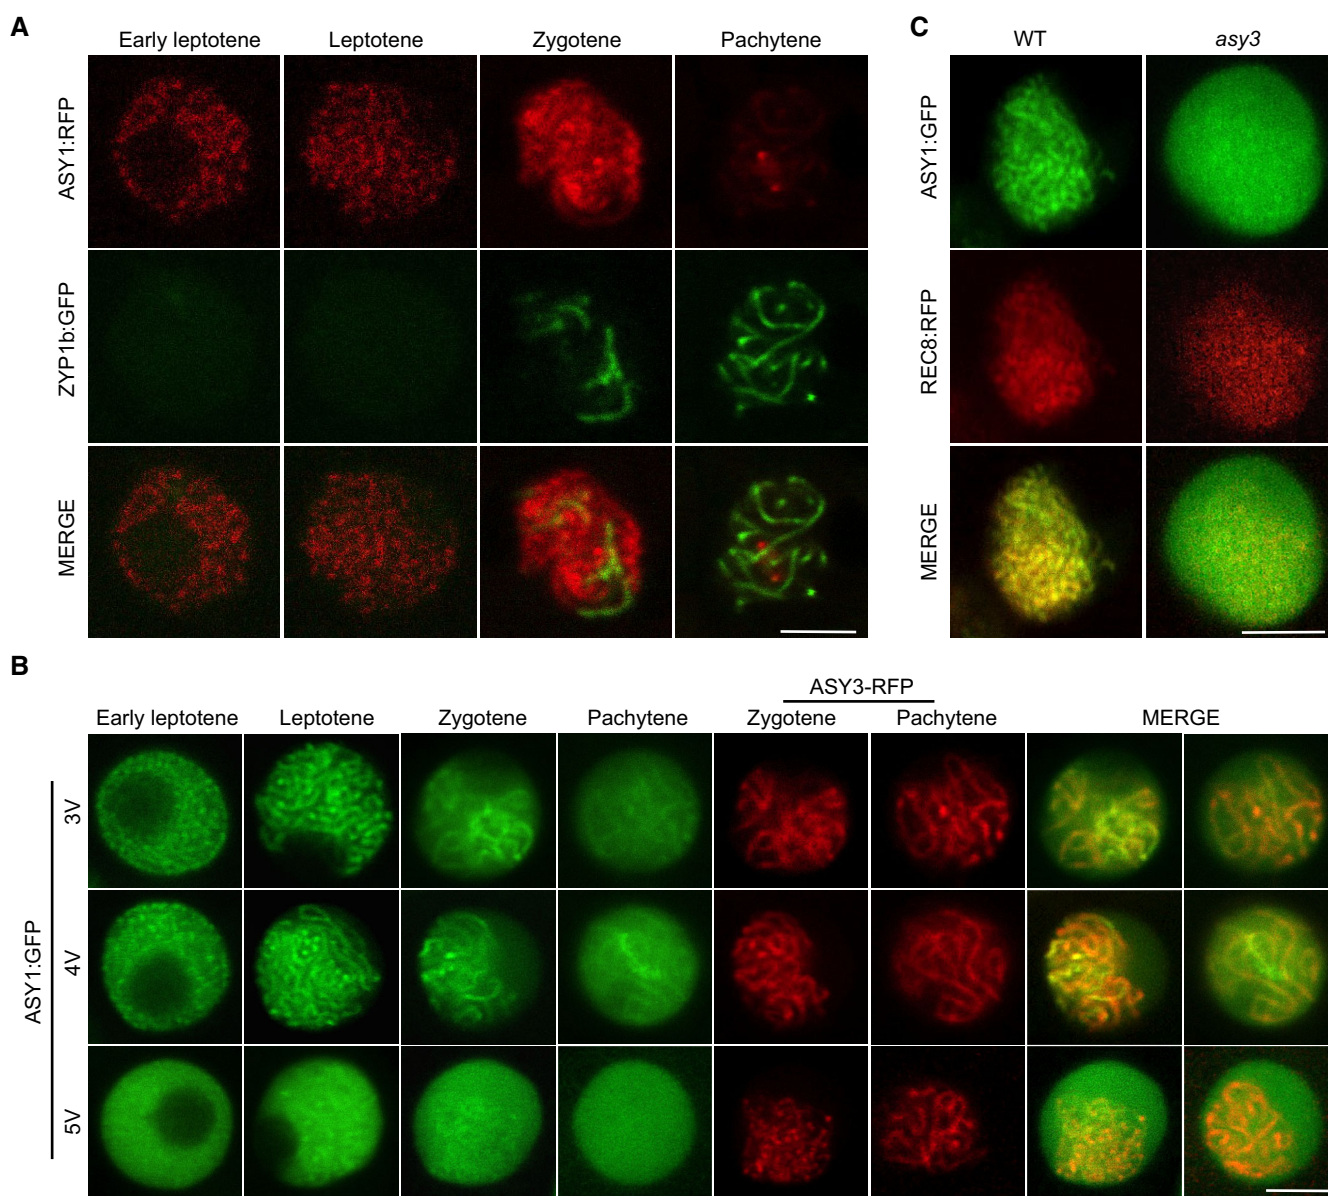

Figure EV2.

**Figure EV2. Localization of ASY1 variants in the wild-type and *asy3* mutants.**

- A Co-localization analysis of ASY1-RFP with ZYP1b-GFP at different meiotic stages in male meiocytes of the wild type. Scale bars: 5  $\mu$ m.
- B Localization of ASY1<sup>3V</sup>:GFP (T365V S382V T535V), ASY1<sup>4V</sup>:GFP (T184V T365V S382V T535V), and ASY1<sup>5V</sup>:GFP (T142V T184V T365V S382V T535V) together with ASY3:RFP (for staging of zygotene and pachytene) at different meiotic stages in male meiocytes of *asy1* mutants. Scale bars: 5  $\mu$ m.
- C Localization of ASY1:GFP in the male meiocytes of the wild-type and *asy3* mutants at leptotene. REC8-RFP was used for staging and to highlight chromosomes. Scale bars: 5  $\mu$ m.

**Figure EV3. Phenotypic characterization of different ASY1:GFP variants.**

- A Schematic graph showing different ASY1 non-phosphorylatable mutants.
- B, C Siliques (B) and seed set (C) of the wild type (WT), *asy1*, ASY1<sup>T142V</sup>, ASY1<sup>T184V</sup>, ASY1<sup>2V</sup>, ASY1<sup>3V</sup>, ASY1<sup>4V</sup>, ASY1<sup>5V</sup>, ASY1<sup>T142S</sup>, and ASY1<sup>T142D</sup>. Red arrowheads indicate aborted seeds.
- D Quantification of the seed set shown in (C) from at least five siliques.
- E Peterson staining of anthers for the wild type (WT), *asy1*, ASY1<sup>T142V</sup>, ASY1<sup>T184V</sup>, ASY1<sup>2V</sup>, ASY1<sup>3V</sup>, ASY1<sup>4V</sup>, ASY1<sup>5V</sup>, ASY1<sup>T142S</sup>, and ASY1<sup>T142D</sup>. Red indicates viable pollen grains, and blue denotes aborted pollen grains.
- F Quantification of the pollen viability assay shown in (E) using at least nine flower buds.

Data information: (D, F) Level of significance ( $P < 0.05$ ) is indicated by different letters as determined by the one-way ANOVA followed by Tukey's test. Error bars represent mean  $\pm$  SD.

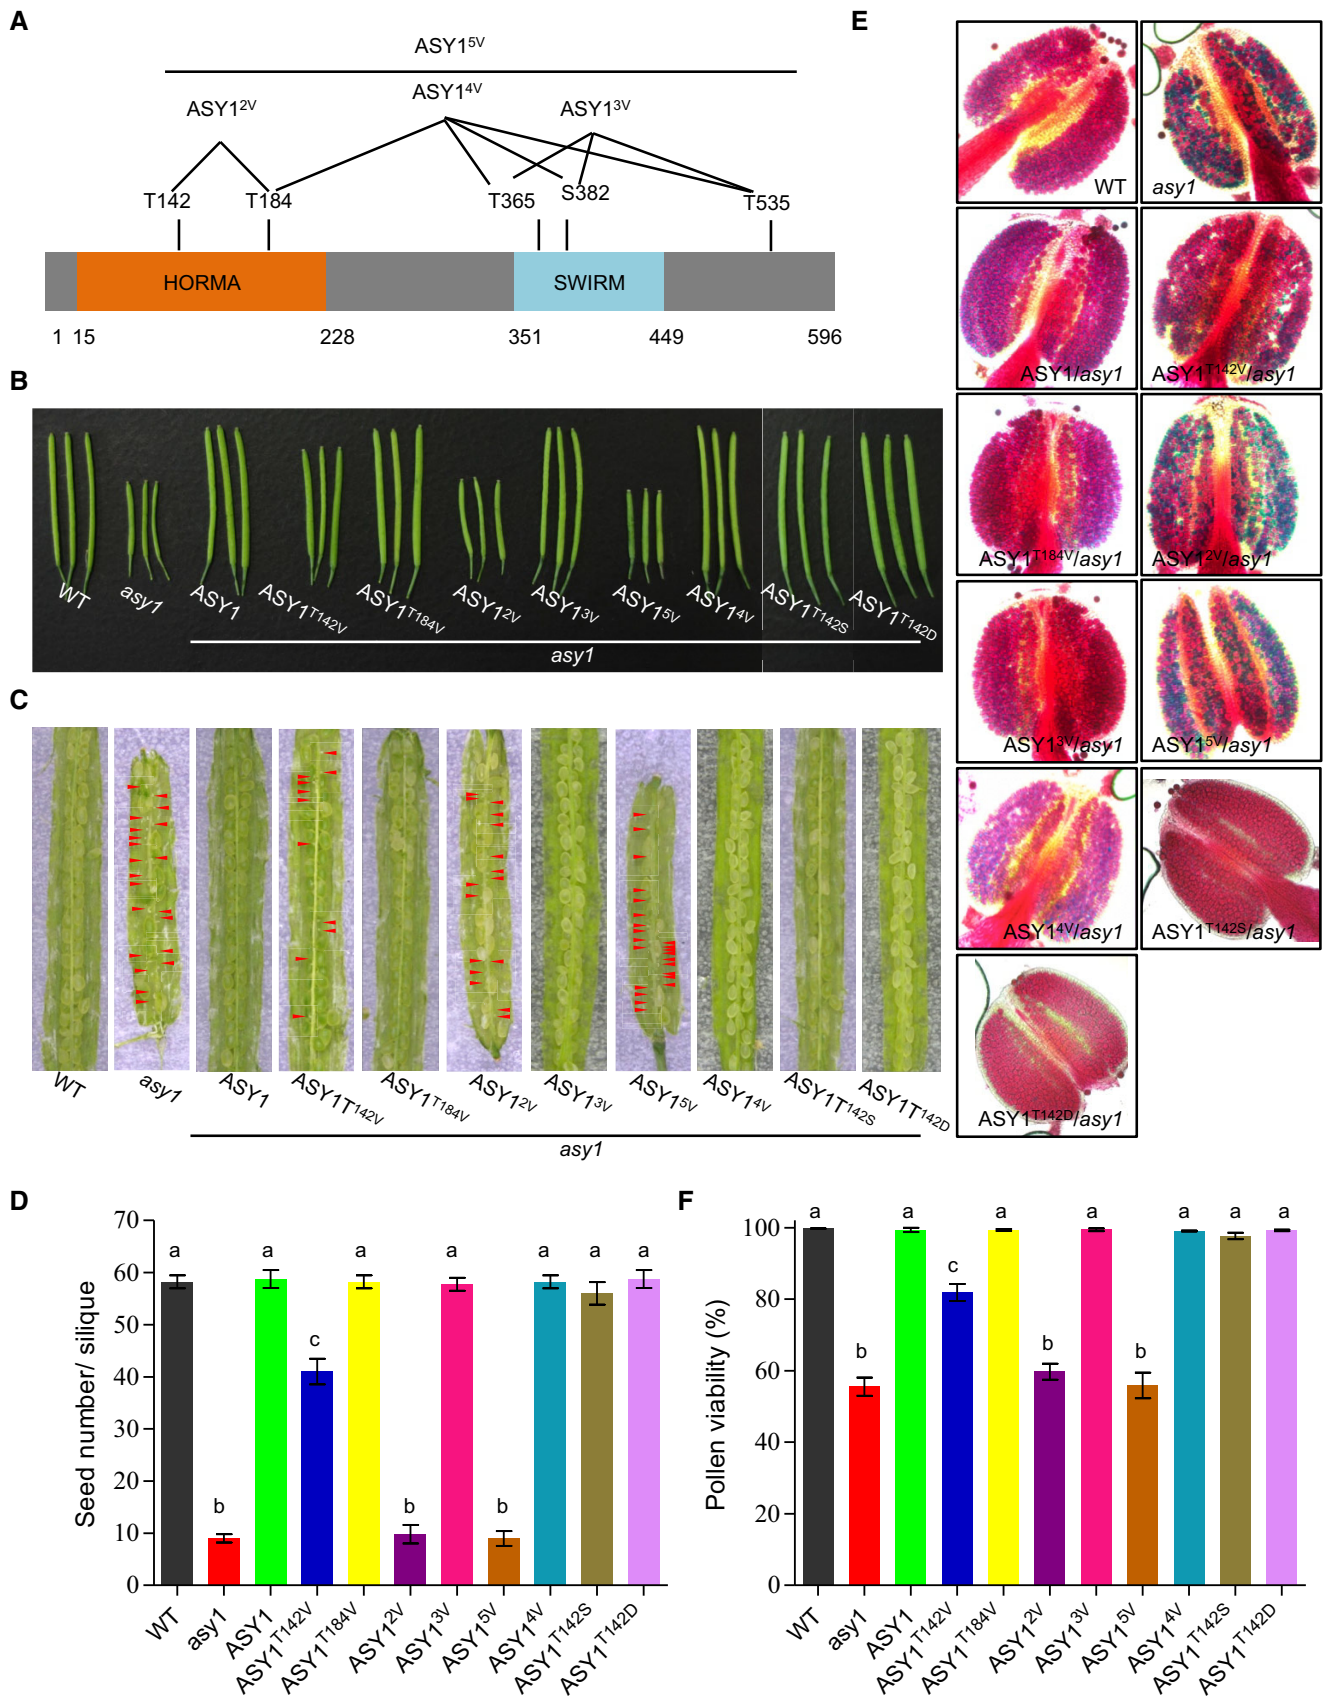

Figure EV3.
