# Supplementary material for: The Arabidopsis Cdk1/Cdk2 homolog CDKA;1 controls chromosome axis assembly during plant meiosis
Source: PubMed Central journal article supplement (PMC6996576; doi:10.15252/embj.2019101625), 2019-09-26

Figure 2D

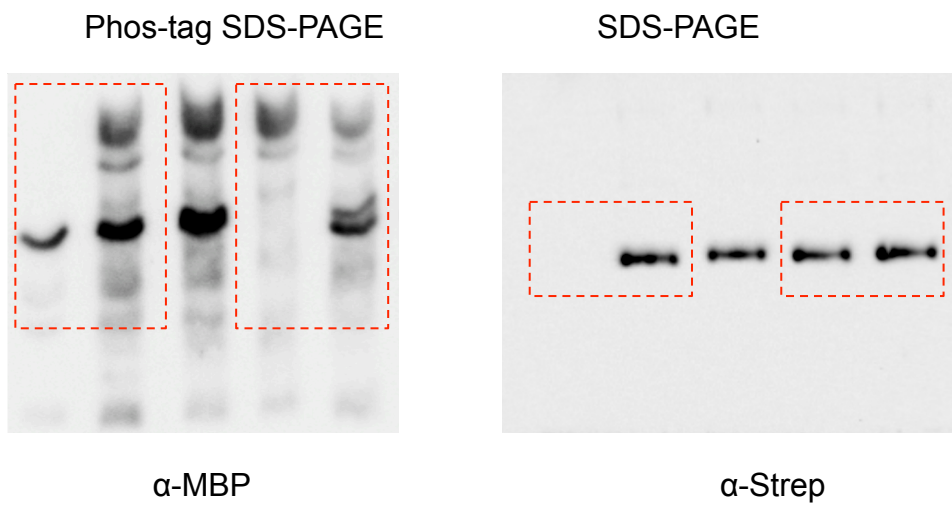

Supplement: EMBJ-39-e101625-s004.pdf [file EMBJ-39-e101625-s004.pdf]
