# Supplementary material for: The Arabidopsis Cdk1/Cdk2 homolog CDKA;1 controls chromosome axis assembly during plant meiosis
Source: PubMed Central journal article supplement (PMC6996576; doi:10.15252/embj.2019101625), 2019-09-26

Appendix Figure S2

B

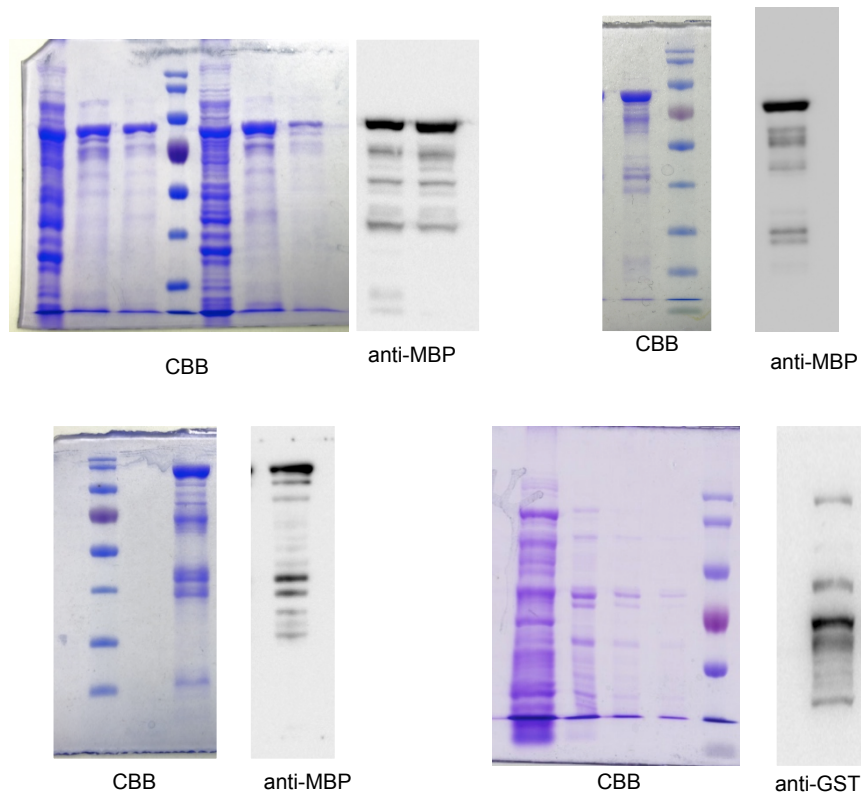

C

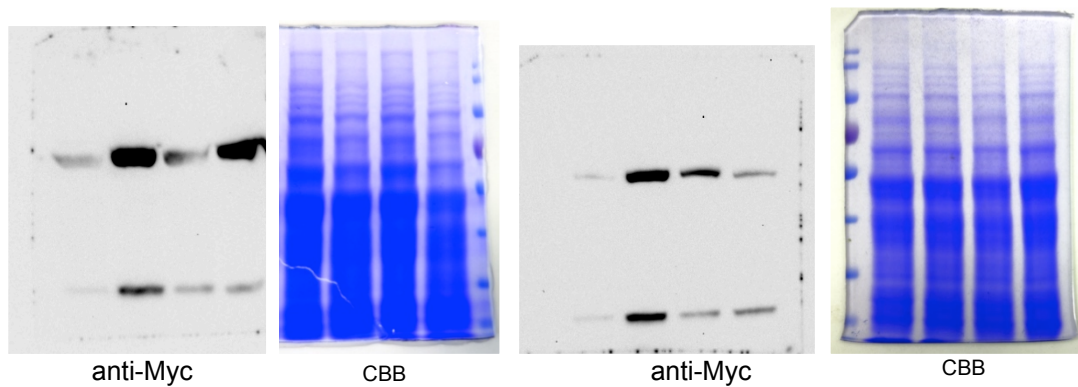

D

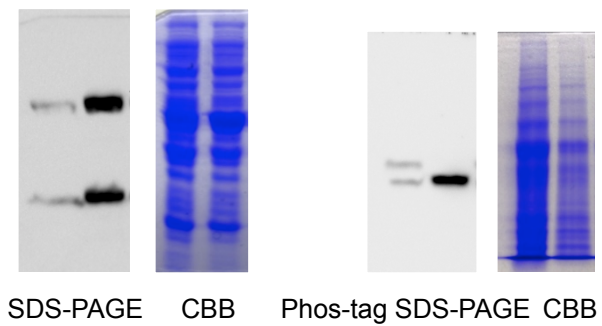

E

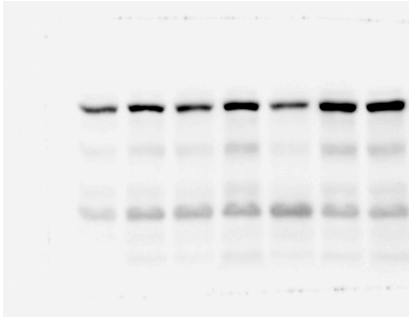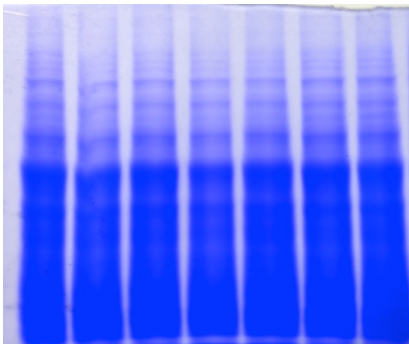

Supplement: EMBJ-39-e101625-s006.pdf [file EMBJ-39-e101625-s006.pdf]
